# Supplementary material for: Parental and household smoking and the increased risk of bronchitis, bronchiolitis and other lower respiratory infections in infancy: systematic review and meta-analysis
Source: Respir Res. 2011 Jan 10;12(1):5. doi: 10.1186/1465-9921-12-5 (PMC3022703; doi:10.1186/1465-9921-12-5)
Supplement: Additional file 1 — Summary of studies included in the meta-analysis. The data provided represent a summary of each of the studies included in the updated meta-analysis. [file 1465-9921-12-5-S1.XLS]

## Sheet: Sheet1
ADDITIONAL FILE 1. SUMMARY OF STUDIES INCLUDED IN THE META-ANALYSIS
Study	Year of Publication*	Study Design	Study Location	Passive Smoke Ascertainment	Exposure	Outcome	Methodological quality†
Al-Sherhi [48]	2005	Case-control	Saudi Arabia	Self-report	Household	Bronchiolitis	6
Anderson [49]	1988	Case-control	USA	Self-report	Household	Bronchiolitis	5
Arshad [17]	1993	Cohort	UK	Self-report	Maternal	Unspecified lower respiratory infection	6
Baker [18]	2006	Cohort	Czech Republic	Self-report	Household	Unspecified lower respiratory infection	8
Blizzard [19]	2003	Cohort	Tasmania	Self-report	Maternal prenatal/ Maternal/ Household	Acute respiratory infection	7
Bonu [63]	2004	Cross-sectional	India	Self-report	Household	Acute respiratory infection	5
Braback [20]	2003	Cohort	Sweden	Self-report	Maternal	Bronchitis	7
Breese-Hall [50]	1984	Case-control	USA	Self-report	Household	Bronchiolitis	5
Broor [51]	2001	Case-control	India	Self-report	Maternal/ Paternal/ Household	Unspecified lower respiratory infection	3
Carroll [21]	2007	Cohort	USA	Self-report	Maternal prenatal	Unspecified lower respiratory infection	7
Chatizmichael [64]	2007	Cross-sectional	Greece	Self-report	Household	Bronchiolitis	3
Chen [66]	1988	Cross-sectional	China	Self-report	Paternal/ Household	Bronchitis	5
Chen [65]	1994	Cross-sectional	China	Self-report	Paternal/ Household	Unspecified lower respiratory infection	4
Duijts [22]	2008	Cohort	Netherlands	Self-report	Maternal prenatal/ Household	Unspecified lower respiratory infection	6
Ekwo [67]	1983	Cross-sectional	USA	Self-report	Maternal/ Paternal/ Both parents/ Household	Unspecified lower respiratory infection	5
El-Sawy [52]	1997	Case-control	Egypt	Biochemical	Paternal	Unspecified lower respiratory infection	8
Etiler [23]	2002	Cohort	Turkey	Self-report (independent observation)	Household	Acute respiratory infection	5
Fergusson [24]	1985	Cohort	New Zealand	Self-report	Maternal/ Paternal/ Both parents/ Household	Bronchitis	8
Ferris [68]	1985	Cross-sectional	USA	Self-report	Maternal/ Paternal/ Both parents/ Household	Unspecified lower respiratory infection	5
Forastiere [69]	1992	Cross-sectional	Italy	Self-report	Maternal/ Paternal/ Both parents/ Household	Unspecified lower respiratory infection	5
Gardner [25]	1984	Cohort	USA	Self-report	Household	Unspecified lower respiratory infection	6
Gergen [70]	1998	Cross-sectional	USA	Self-report	Maternal prenatal/ Household	Bronchitis	5
Gürkan [53]	2000	Case-control	Turkey	Self-report	Maternal/ Paternal/ Both parents	Bronchiolitis	4
Håberg [26]	2007	Cohort	Norway	Self-report	Maternal prenatal/ Paternal	Unspecified lower respiratory infection	6
Hakansson [76]	1992	Cohort	Sweden	Self-report	Household	Bronchitis	6
Harlap [27]	1974	Cohort	UK	Self-report	Maternal	Bronchitis	6
Hassan [54]	2001	Case-control	Iraq	Self-report	Household	Pneumonia	4
Hayes [55]	1989	Case-control	Samoa	Self-report	Household	Bronchiolitis	4
Jin [28]	1993	Cohort	China	Self-report	Paternal/ Household	Bronchitis	7
Koch [29]	2003	Cohort	Greenland	Self-report	Maternal/ Paternal/ Household	Unspecified lower respiratory infection	8
Koehoorn [30]	2008	Cohort	British Columbia	Self-report	Maternal prenatal	Unspecified lower respiratory infection	7
Kristensen [31]	2006	Cohort	South Africa	Self-report	Maternal/ Paternal/ Household	Acute respiratory infection	7
Latzin [32]	2007	Cohort	Switzerland	Self-report	Maternal prenatal	Unspecified lower respiratory infection	6
Leeder [33]	1976	Cohort	UK	Self-report	Both parents/ Household	Bronchitis	6
Lister [71]	1998	Cross-sectional	Australia	Self-report	Maternal/ Household	Bronchitis	3
Marbury [34]	1996	Cohort	USA	Self-report	Maternal	Unspecified lower respiratory infection	7
Margolis [35]	1997	Cohort	USA	Biochemical	Household	Unspecified lower respiratory infection	6
Maziak [72]	1999	Cross-sectional	Syrian Arab Republic	Self-report	Both parents	Acute respiratory infection	3
McConnochie [56]	1986	Case-control	USA	Self-report	Maternal/ Household	Bronchiolitis	4
Mok [57]	1982	Case-control	UK	Self-report	Maternal	Bronchitis	8
Noakes [36]	2007	Cohort	Australia	Self-report	Maternal	Bronchiolitis	4
Nuesslein [37]	1999	Cohort	Germany	Biochemical	Maternal prenatal/ Household	Unspecified lower respiratory infection	6
Ogston [38]	1985	Cohort	UK	Self-report	Maternal/ Paternal/ Both parents/ Household	Unspecified lower respiratory infection	7
Ogston [39]	1987	Cohort	UK	Self-report	Maternal/ Paternal/ Both parents/ Household	Unspecified lower respiratory infection	7
Pedreira [40]	1985	Cohort	USA	Self-report	Household	Unspecified lower respiratory infection	6
Puig [41]	2008	Cohort	Spain	Biochemical	Maternal prenatal/ Maternal/ Paternal	Unspecified lower respiratory infection	5
Rahman [42]	1997	Cohort	Bangladesh	Self-report	Both parents	Acute respiratory infection	4
Rantakallio [43]	1978	Cohort	Finland	Self-report	Maternal	Unspecified lower respiratory infection	8
Reese [73]	1992	Cross-sectional	Australia	Biochemical	Maternal/ Paternal/ Both parents/ Household	Bronchiolitis	5
Ruskamp [47]	2010	Cohort	Netherlands	Self-report	Maternal prenatal	Unspecified lower respiratory infection	6
Rylander [58]	1995	Case-control	Sweden	Biochemical	Maternal/ Paternal/ Both parents/ Household	Unspecified lower respiratory infection	9
Sims [59]	1978	Case-control	UK	Self-report	Maternal	Bronchiolitis	7
Stern [74]	1989	Cross-sectional	Canada	Self-report	Maternal	Unspecified lower respiratory infection	4
Suzuki [75]	2009	Cross-sectional	Vietnam	Self-report	Household	Pneumonia	6
Tager [44]	1993	Cohort	USA	Biochemical	Maternal	Unspecified lower respiratory infection	5
Taylor [45]	1987	Cohort	UK	Self-report	Maternal/ Paternal/ Both parents/ Household	Unspecified lower respiratory infection	6
Victora [60]	1994	Case-control	Brazil	Self-report	Maternal/ Paternal/ Both parents/ Household	Pneumonia	7
Weber [61]	1999	Case-control	The Gambia	Self-report	Maternal/ Paternal	Acute respiratory infection	7
Woodward [62]	1990	Case-control	Australia	Self-report	Maternal	Unspecified lower respiratory infection	6
Wright [46]	1991	Cohort	USA	Biochemical	Maternal	Unspecified lower respiratory infection	8
*Methodological quality of the studies are based on the Newcastle Ottawa Quality Assessment Scale
† Studies published prior to 1997 from previous Strachan and Cook review [3]
